# Supplementary material
Source: publisher figshare collection journal article supplement (https://gsajournals.figshare.com/articles/dataset/_/12844358)
Supplement: Supplementary file 1 [file 1]

## Sheet: Supplementary Table S12-diff
1 = upregulated; -1 = downregulated
	pd_ar	ar_im	im_rp
AT1G01010	0	-1	1
AT1G01020	0	-1	1
AT1G01030	0	0	-1
AT1G01040	0	-1	1
AT1G01046	0	-1	0
AT1G01050	0	-1	-1
AT1G01060	0	-1	-1
AT1G01070	0	0	-1
AT1G01080	0	-1	-1
AT1G01090	0	-1	-1
AT1G01100	0	-1	-1
AT1G01110	0	-1	-1
AT1G01115	0	0	0
AT1G01120	0	0	-1
AT1G01130	0	0	-1
AT1G01140	0	-1	-1
AT1G01150	0	0	0
AT1G01160	0	0	1
AT1G01170	0	1	1
AT1G01180	0	1	1
AT1G01183	0	0	0
AT1G01190	0	1	1
AT1G01200	0	0	-1
AT1G01210	0	-1	1
AT1G01220	0	-1	-1
AT1G01225	0	1	-1
AT1G01230	0	1	1
AT1G01240	0	1	1
AT1G01250	0	1	1
AT1G01260	0	0	0
AT1G01280	0	1	0
AT1G01290	0	-1	0
AT1G01300	0	-1	-1
AT1G01305	0	0	0
AT1G01310	0	1	0
AT1G01320	0	0	-1
AT1G01340	0	-1	1
AT1G01350	0	0	1
AT1G01355	0	1	1
AT1G01360	0	1	1
AT1G01370	0	-1	-1
AT1G01380	0	0	-1
AT1G01390	0	0	-1
AT1G01400	0	0	0
AT1G01410	0	0	0
AT1G01420	0	1	0
AT1G01430	0	0	-1
AT1G01440	0	-1	0
AT1G01448	0	1	1
AT1G01450	0	0	0
AT1G01453	0	-1	-1
AT1G01460	0	0	0
AT1G01470	0	1	1
AT1G01471	0	0	0
AT1G01480	0	1	1
AT1G01490	0	-1	-1
AT1G01500	0	1	1
AT1G01510	0	-1	-1
AT1G01520	0	1	1
AT1G01530	0	0	0
AT1G01540	0	-1	-1
AT1G01550	0	0	1
AT1G01560	0	0	0
AT1G01570	0	1	0
AT1G01580	0	1	1
AT1G01590	0	0	1
AT1G01600	0	0	-1
AT1G01610	0	0	-1
AT1G01620	0	-1	-1
AT1G01630	0	-1	-1
AT1G01640	0	0	1
AT1G01650	0	1	1
AT1G01660	0	1	-1
AT1G01670	0	0	0
AT1G01680	0	0	1
AT1G01690	0	-1	0
AT1G01695	0	1	0
AT1G01700	0	0	0
AT1G01710	0	1	0
AT1G01720	0	1	1
AT1G01725	0	1	1
AT1G01730	0	0	1
AT1G01740	0	-1	1
AT1G01750	0	0	-1
AT1G01760	0	0	0
AT1G01770	0	0	1
AT1G01780	0	1	-1
AT1G01790	0	0	-1
AT1G01800	0	0	0
AT1G01810	0	-1	1
AT1G01820	0	0	1
AT1G01830	0	1	-1
AT1G01840	0	0	1
AT1G01860	0	0	-1
AT1G01880	0	1	0
AT1G01900	0	0	-1
AT1G01910	0	-1	0
AT1G01920	0	0	1
AT1G01930	0	1	1
AT1G01940	0	-1	1
AT1G01950	0	-1	0
AT1G01960	0	0	-1
AT1G01970	0	1	1
AT1G01980	0	1	-1
AT1G01990	0	0	1
AT1G02000	0	0	-1
AT1G02010	0	0	-1
AT1G02020	0	-1	1
AT1G02030	0	0	0
AT1G02040	0	0	-1
AT1G02050	0	0	1
AT1G02060	0	0	0
AT1G02065	0	1	0
AT1G02070	0	0	0
AT1G02074	0	0	0
AT1G02080	0	-1	1
AT1G02090	0	0	1
AT1G02100	0	0	1
AT1G02110	0	0	1
AT1G02120	0	0	1
AT1G02130	0	-1	1
AT1G02140	0	-1	1
AT1G02145	0	-1	0
AT1G02150	0	1	-1
AT1G02160	0	0	1
AT1G02170	0	0	-1
AT1G02180	0	0	-1
AT1G02190	0	0	0
AT1G02205	0	0	-1
AT1G02210	0	0	0
AT1G02220	0	0	0
AT1G02228	0	0	-1
AT1G02230	0	1	1
AT1G02250	0	0	0
AT1G02260	0	0	1
AT1G02270	0	0	1
AT1G02280	0	-1	-1
AT1G02290	0	-1	0
AT1G02300	0	0	-1
AT1G02305	0	-1	0
AT1G02310	0	1	1
AT1G02320	0	0	0
AT1G02330	0	-1	1
AT1G02335	0	0	-1
AT1G02340	0	1	-1
AT1G02350	0	0	0
AT1G02360	0	0	-1
AT1G02370	0	-1	1
AT1G02380	0	1	1
AT1G02390	0	0	-1
AT1G02391	0	0	0
AT1G02400	0	1	-1
AT1G02405	0	-1	1
AT1G02410	0	-1	1
AT1G02420	0	-1	1
AT1G02430	0	0	-1
AT1G02440	0	0	0
AT1G02450	0	0	0
AT1G02460	0	0	-1
AT1G02470	0	0	-1
AT1G02475	0	0	-1
AT1G02500	0	-1	-1
AT1G02510	0	0	0
AT1G02520	0	-1	0
AT1G02530	0	0	0
AT1G02540	0	0	0
AT1G02550	0	-1	0
AT1G02560	0	-1	-1
AT1G02570	0	0	-1
AT1G02575	0	0	-1
AT1G02580	0	0	0
AT1G02590	0	0	0
AT1G02610	0	1	1
AT1G02620	0	0	0
AT1G02630	0	0	-1
AT1G02640	0	0	-1
AT1G02650	0	1	1
AT1G02660	0	1	1
AT1G02670	0	1	-1
AT1G02680	0	0	1
AT1G02690	0	-1	1
AT1G02700	0	0	1
AT1G02710	0	1	0
AT1G02720	0	0	-1
AT1G02730	0	0	-1
AT1G02740	0	0	1
AT1G02750	0	-1	1
AT1G02770	0	0	1
AT1G02780	0	-1	-1
AT1G02790	1	1	1
AT1G02800	0	1	-1
AT1G02810	0	1	-1
AT1G02813	0	0	0
AT1G02816	0	0	1
AT1G02820	0	-1	0
AT1G02830	0	-1	0
AT1G02840	0	-1	1
AT1G02850	0	-1	1
AT1G02860	0	-1	0
AT1G02870	0	-1	1
AT1G02880	0	0	1
AT1G02890	0	1	1
AT1G02900	0	0	-1
AT1G02910	0	0	0
AT1G02920	0	-1	-1
AT1G02930	0	-1	0
AT1G02940	0	1	0
AT1G02950	0	0	-1
AT1G02960	0	0	1
AT1G02970	0	0	-1
AT1G02980	0	0	1
AT1G02990	0	0	1
AT1G03000	0	-1	0
AT1G03010	0	1	0
AT1G03020	0	0	0
AT1G03022	0	0	0
AT1G03030	0	1	1
AT1G03040	0	0	1
AT1G03050	0	0	0
AT1G03055	0	0	0
AT1G03060	0	0	-1
AT1G03070	0	1	0
AT1G03080	0	0	-1
AT1G03090	0	1	1
AT1G03100	0	-1	1
AT1G03103	0	0	1
AT1G03106	0	1	1
AT1G03110	0	-1	0
AT1G03120	0	1	1
AT1G03130	0	1	-1
AT1G03140	0	0	1
AT1G03150	0	-1	0
AT1G03160	0	-1	-1
AT1G03170	0	1	0
AT1G03180	0	0	0
AT1G03190	0	-1	1
AT1G03210	0	0	1
AT1G03220	0	-1	1
AT1G03230	0	-1	1
AT1G03250	0	-1	0
AT1G03260	0	0	0
AT1G03270	0	1	1
AT1G03280	0	-1	1
AT1G03290	0	-1	-1
AT1G03300	0	-1	0
AT1G03310	0	-1	-1
AT1G03320	0	0	-1
AT1G03330	0	-1	1
AT1G03340	0	-1	1
AT1G03350	0	-1	1
AT1G03360	0	-1	1
AT1G03365	0	0	1
AT1G03370	0	0	-1
AT1G03380	0	1	1
AT1G03390	0	0	1
AT1G03400	0	1	1
AT1G03410	0	0	-1
AT1G03430	0	0	-1
AT1G03440	0	-1	1
AT1G03445	0	1	0
AT1G03457	0	0	-1
AT1G03470	0	1	1
AT1G03475	0	-1	-1
AT1G03490	0	1	0
AT1G03495	0	0	0
AT1G03510	0	0	0
AT1G03520	0	0	-1
AT1G03530	0	-1	1
AT1G03540	0	0	-1
AT1G03545	0	-1	0
AT1G03550	0	-1	-1
AT1G03560	0	-1	0
AT1G03590	0	1	-1
AT1G03600	0	1	-1
AT1G03610	0	1	1
AT1G03620	0	1	1
AT1G03630	0	1	-1
AT1G03650	0	0	1
AT1G03660	0	-1	-1
AT1G03670	0	0	0
AT1G03680	0	0	-1
AT1G03687	0	-1	-1
AT1G03700	0	1	0
AT1G03710	0	0	0
AT1G03720	0	0	0
AT1G03730	0	-1	0
AT1G03740	0	0	0
AT1G03746	0	-1	1
AT1G03750	0	0	1
AT1G03760	0	1	1
AT1G03770	0	1	1
AT1G03780	0	0	-1
AT1G03790	0	1	1
AT1G03800	0	0	0
AT1G03810	0	1	0
AT1G03820	0	0	-1
AT1G03830	0	-1	1
AT1G03840	0	1	-1
AT1G03850	0	-1	-1
AT1G03860	0	-1	-1
AT1G03870	0	0	-1
AT1G03880	0	1	1
AT1G03890	0	1	1
AT1G03900	0	-1	-1
AT1G03905	0	1	1
AT1G03910	0	-1	1
AT1G03920	0	0	0
AT1G03930	0	0	1
AT1G03940	0	0	-1
AT1G03950	0	1	1
AT1G03960	0	-1	1
AT1G03970	0	1	1
AT1G03980	0	0	-1
AT1G03982	0	1	0
AT1G03990	0	-1	1
AT1G04000	0	1	0
AT1G04010	0	1	-1
AT1G04020	0	0	-1
AT1G04030	0	0	1
AT1G04040	0	0	-1
AT1G04050	0	0	1
AT1G04070	0	-1	1
AT1G04080	0	-1	1
AT1G04090	0	1	0
AT1G04100	0	1	1
AT1G04110	0	0	-1
AT1G04120	0	0	1
AT1G04130	0	-1	1
AT1G04140	0	-1	1
AT1G04150	0	0	-1
AT1G04160	0	0	-1
AT1G04170	0	-1	0
AT1G04171	0	0	0
AT1G04180	0	0	-1
AT1G04190	0	-1	1
AT1G04200	0	1	-1
AT1G04210	0	-1	1
AT1G04220	0	0	-1
AT1G04230	0	0	1
AT1G04240	0	0	-1
AT1G04250	0	0	-1
AT1G04260	0	0	1
AT1G04270	0	-1	-1
AT1G04280	0	0	-1
AT1G04290	0	0	-1
AT1G04300	0	1	1
AT1G04310	0	1	-1
AT1G04330	0	1	1
AT1G04340	0	-1	-1
AT1G04350	0	0	1
AT1G04360	0	1	0
AT1G04370	0	0	0
AT1G04380	0	0	0
AT1G04390	0	0	1
AT1G04400	0	1	0
AT1G04410	0	-1	-1
AT1G04420	0	0	-1
AT1G04425	0	0	-1
AT1G04430	0	0	-1
AT1G04440	0	0	0
AT1G04445	0	0	1
AT1G04450	0	0	0
AT1G04470	0	1	0
AT1G04480	0	-1	-1
AT1G04490	0	0	-1
AT1G04500	0	1	1
AT1G04501	0	0	0
AT1G04510	0	-1	1
AT1G04520	0	-1	-1
AT1G04530	0	1	1
AT1G04540	0	1	0
AT1G04550	0	-1	0
AT1G04555	0	1	1
AT1G04560	0	1	1
AT1G04570	0	0	1
AT1G04580	0	0	0
AT1G04590	0	0	1
AT1G04600	0	0	0
AT1G04610	0	0	-1
AT1G04620	0	0	-1
AT1G04625	0	-1	-1
AT1G04630	0	-1	-1
AT1G04635	0	-1	1
AT1G04640	0	0	-1
AT1G04645	0	0	0
AT1G04650	0	0	1
AT1G04660	0	-1	1
AT1G04670	0	0	-1
AT1G04680	0	0	-1
AT1G04684	0	0	0
AT1G04690	0	-1	-1
AT1G04700	0	0	-1
AT1G04710	0	0	-1
AT1G04730	0	0	-1
AT1G04750	0	-1	-1
AT1G04760	0	1	-1
AT1G04770	0	-1	1
AT1G04778	0	0	-1
AT1G04780	0	-1	0
AT1G04790	0	0	1
AT1G04800	0	0	0
AT1G04810	0	-1	1
AT1G04820	0	0	-1
AT1G04830	0	1	1
AT1G04840	0	-1	0
AT1G04850	0	-1	0
AT1G04860	0	-1	1
AT1G04870	0	-1	1
AT1G04880	0	0	0
AT1G04890	0	0	0
AT1G04900	0	-1	-1
AT1G04910	0	0	1
AT1G04920	0	1	1
AT1G04930	0	-1	1
AT1G04940	0	-1	-1
AT1G04945	0	-1	1
AT1G04950	0	1	1
AT1G04960	0	0	1
AT1G04970	0	0	0
AT1G04980	0	0	-1
AT1G04985	0	1	0
AT1G04990	0	0	-1
AT1G05000	0	0	-1
AT1G05010	0	0	-1
AT1G05020	0	0	-1
AT1G05030	0	1	1
AT1G05040	0	0	0
AT1G05055	0	-1	0
AT1G05060	0	1	1
AT1G05065	0	-1	0
AT1G05070	0	0	-1
AT1G05080	0	0	0
AT1G05085	0	0	0
AT1G05100	0	0	0
AT1G05120	0	1	1
AT1G05136	0	0	0
AT1G05140	0	0	-1
AT1G05150	0	1	0
AT1G05160	0	0	1
AT1G05170	0	1	0
AT1G05180	0	-1	1
AT1G05190	0	-1	-1
AT1G05200	0	1	-1
AT1G05205	0	-1	-1
AT1G05210	0	0	-1
AT1G05220	0	0	-1
AT1G05230	0	-1	-1
AT1G05260	0	0	-1
AT1G05270	0	0	1
AT1G05280	0	0	-1
AT1G05290	0	0	-1
AT1G05291	0	-1	0
AT1G05300	0	0	-1
AT1G05310	0	1	-1
AT1G05320	0	0	-1
AT1G05330	0	1	1
AT1G05340	0	1	1
AT1G05350	0	0	-1
AT1G05360	0	0	-1
AT1G05370	0	1	-1
AT1G05380	0	1	1
AT1G05385	0	0	-1
AT1G05400	0	0	1
AT1G05410	0	0	1
AT1G05420	0	1	-1
AT1G05430	0	-1	0
AT1G05440	0	0	-1
AT1G05450	0	0	-1
AT1G05460	0	-1	1
AT1G05470	0	0	-1
AT1G05490	0	1	0
AT1G05500	0	0	1
AT1G05510	0	1	1
AT1G05520	0	-1	0
AT1G05530	0	0	-1
AT1G05540	0	0	0
AT1G05550	0	0	1
AT1G05560	0	0	1
AT1G05570	0	0	-1
AT1G05575	0	0	-1
AT1G05577	0	0	0
AT1G05580	1	0	0
AT1G05590	0	0	-1
AT1G05600	0	-1	1
AT1G05610	0	0	0
AT1G05615	0	1	1
AT1G05620	0	0	-1
AT1G05630	0	-1	-1
AT1G05640	0	0	-1
AT1G05650	0	1	0
AT1G05660	0	1	1
AT1G05670	0	0	1
AT1G05675	0	0	-1
AT1G05680	0	-1	1
AT1G05690	0	1	0
AT1G05700	0	1	-1
AT1G05710	0	-1	1
AT1G05720	0	-1	-1
AT1G05730	0	-1	1
AT1G05740	0	-1	1
AT1G05750	0	0	0
AT1G05770	0	0	-1
AT1G05780	0	0	0
AT1G05785	0	-1	1
AT1G05790	0	1	1
AT1G05800	0	0	0
AT1G05805	0	0	-1
AT1G05810	0	0	-1
AT1G05820	0	1	-1
AT1G05830	0	0	0
AT1G05835	0	1	-1
AT1G05840	0	1	1
AT1G05850	0	0	-1
AT1G05860	0	1	1
AT1G05870	0	0	-1
AT1G05880	0	0	-1
AT1G05890	0	1	1
AT1G05894	0	1	0
AT1G05900	0	-1	0
AT1G05910	0	-1	0
AT1G05920	0	0	0
AT1G05925	0	0	0
AT1G05930	0	0	0
AT1G05940	0	0	1
AT1G05950	0	0	-1
AT1G05960	0	0	-1
AT1G05970	0	0	0
AT1G05990	0	0	-1
AT1G06000	0	1	-1
AT1G06002	0	0	0
AT1G06010	0	0	1
AT1G06020	0	0	-1
AT1G06030	0	0	0
AT1G06040	0	0	-1
AT1G06050	0	0	0
AT1G06060	0	1	0
AT1G06070	0	-1	1
AT1G06080	0	0	-1
AT1G06090	0	0	-1
AT1G06100	0	0	-1
AT1G06110	0	1	1
AT1G06120	0	0	0
AT1G06130	0	1	1
AT1G06135	0	0	0
AT1G06137	0	0	-1
AT1G06140	0	0	0
AT1G06148	0	0	0
AT1G06149	0	-1	0
AT1G06150	0	-1	0
AT1G06160	0	1	0
AT1G06170	0	0	-1
AT1G06180	0	0	-1
AT1G06190	0	-1	-1
AT1G06200	0	0	1
AT1G06210	0	0	1
AT1G06220	0	-1	1
AT1G06225	0	0	0
AT1G06230	0	0	1
AT1G06240	0	0	-1
AT1G06250	0	0	0
AT1G06260	0	0	0
AT1G06265	0	1	1
AT1G06270	0	-1	1
AT1G06280	0	0	0
AT1G06290	0	0	-1
AT1G06310	0	0	-1
AT1G06320	0	0	0
AT1G06330	0	0	-1
AT1G06340	0	0	0
AT1G06350	0	0	-1
AT1G06360	0	0	-1
AT1G06380	0	-1	1
AT1G06390	0	-1	-1
AT1G06400	0	1	1
AT1G06410	0	0	0
AT1G06420	0	1	-1
AT1G06430	0	0	1
AT1G06440	0	-1	0
AT1G06450	0	-1	1
AT1G06460	0	1	-1
AT1G06470	0	-1	-1
AT1G06475	0	0	-1
AT1G06490	0	0	0
AT1G06500	0	0	1
AT1G06510	0	0	-1
AT1G06515	0	-1	-1
AT1G06520	0	-1	1
AT1G06530	0	-1	1
AT1G06540	0	1	1
AT1G06550	0	0	-1
AT1G06560	0	-1	-1
AT1G06570	0	1	1
AT1G06580	0	-1	0
AT1G06590	0	0	1
AT1G06620	0	0	-1
AT1G06630	0	1	1
AT1G06640	0	0	-1
AT1G06645	0	1	1
AT1G06650	0	0	1
AT1G06660	0	0	-1
AT1G06670	0	-1	0
AT1G06680	0	1	-1
AT1G06690	0	1	-1
AT1G06700	0	-1	0
AT1G06710	0	-1	1
AT1G06720	0	-1	1
AT1G06730	0	-1	-1
AT1G06740	0	-1	1
AT1G06750	0	0	-1
AT1G06760	0	-1	1
AT1G06770	0	-1	1
AT1G06780	0	-1	1
AT1G06790	0	-1	0
AT1G06800	0	1	-1
AT1G06810	0	0	0
AT1G06820	0	-1	-1
AT1G06830	0	0	-1
AT1G06840	0	-1	0
AT1G06850	0	0	-1
AT1G06870	0	-1	-1
AT1G06890	0	-1	-1
AT1G06900	0	-1	-1
AT1G06910	0	-1	1
AT1G06920	0	0	0
AT1G06923	0	0	-1
AT1G06925	0	-1	0
AT1G06930	0	-1	-1
AT1G06950	0	-1	-1
AT1G06960	0	-1	0
AT1G06970	0	1	0
AT1G06980	0	0	-1
AT1G06990	0	1	0
AT1G07000	0	0	-1
AT1G07010	0	0	-1
AT1G07020	0	-1	-1
AT1G07025	0	0	-1
AT1G07030	0	0	1
AT1G07040	0	1	0
AT1G07050	0	0	-1
AT1G07051	0	1	0
AT1G07060	0	0	1
AT1G07070	0	-1	-1
AT1G07080	0	0	1
AT1G07090	0	-1	1
AT1G07110	0	0	0
AT1G07119	0	0	1
AT1G07120	0	0	0
AT1G07128	0	0	0
AT1G07130	0	0	1
AT1G07135	0	1	-1
AT1G07140	0	-1	0
AT1G07150	0	1	0
AT1G07160	0	0	-1
AT1G07170	0	0	1
AT1G07180	0	-1	1
AT1G07190	0	0	0
AT1G07200	0	0	-1
AT1G07210	0	-1	-1
AT1G07220	0	-1	1
AT1G07230	0	1	1
AT1G07240	0	1	-1
AT1G07250	0	0	-1
AT1G07260	0	0	-1
AT1G07270	0	0	0
AT1G07280	0	0	-1
AT1G07290	0	0	-1
AT1G07300	0	1	0
AT1G07310	0	1	1
AT1G07320	0	0	-1
AT1G07330	0	0	1
AT1G07340	0	0	-1
AT1G07350	0	-1	1
AT1G07360	0	-1	1
AT1G07370	0	0	-1
AT1G07380	0	-1	1
AT1G07390	0	0	1
AT1G07400	0	0	1
AT1G07410	0	-1	-1
AT1G07420	0	-1	1
AT1G07430	0	0	1
AT1G07440	0	0	-1
AT1G07450	0	1	0
AT1G07460	0	1	1
AT1G07470	0	1	0
AT1G07473	0	1	1
AT1G07476	0	0	0
AT1G07480	0	1	1
AT1G07485	0	0	-1
AT1G07500	0	1	1
AT1G07510	0	-1	1
AT1G07520	0	-1	0
AT1G07530	0	1	1
AT1G07540	0	1	1
AT1G07550	0	0	0
AT1G07560	0	0	0
AT1G07570	0	0	-1
AT1G07590	0	0	1
AT1G07610	0	-1	-1
AT1G07615	0	0	1
AT1G07620	0	0	-1
AT1G07630	0	-1	-1
AT1G07640	0	-1	-1
AT1G07645	0	1	1
AT1G07650	0	0	-1
AT1G07660	0	0	1
AT1G07670	0	-1	-1
AT1G07680	0	0	-1
AT1G07690	0	0	-1
AT1G07700	0	0	1
AT1G07702	0	0	0
AT1G07705	0	-1	0
AT1G07710	0	1	-1
AT1G07720	0	1	-1
AT1G07725	0	1	1
AT1G07730	0	0	1
AT1G07740	0	0	0
AT1G07745	0	1	1
AT1G07747	0	0	0
AT1G07750	0	-1	0
AT1G07770	0	-1	-1
AT1G07790	0	-1	-1
AT1G07795	0	0	-1
AT1G07800	0	0	0
AT1G07810	0	-1	-1
AT1G07820	0	-1	-1
AT1G07830	0	-1	1
AT1G07840	0	-1	1
AT1G07850	0	1	0
AT1G07860	0	0	-1
AT1G07870	0	0	1
AT1G07880	0	0	0
AT1G07885	0	0	0
AT1G07890	0	-1	-1
AT1G07900	0	0	0
AT1G07901	0	-1	0
AT1G07910	0	1	1
AT1G07920	0	-1	-1
AT1G07930	0	-1	0
AT1G07940	0	-1	0
AT1G07950	0	-1	1
AT1G07960	0	-1	0
AT1G07970	0	0	1
AT1G07980	0	1	1
AT1G07985	0	1	1
AT1G07990	0	0	1
AT1G08000	0	-1	0
AT1G08005	0	0	0
AT1G08010	0	-1	0
AT1G08030	0	0	0
AT1G08032	0	0	0
AT1G08035	0	1	0
AT1G08040	0	0	1
AT1G08050	0	1	1
AT1G08060	0	0	1
AT1G08065	0	0	0
AT1G08070	0	1	0
AT1G08080	0	0	0
AT1G08090	0	0	0
AT1G08100	0	0	0
AT1G08105	0	0	0
AT1G08110	0	0	1
AT1G08120	0	-1	0
AT1G08125	0	-1	1
AT1G08130	0	-1	0
AT1G08135	0	0	0
AT1G08140	0	1	0
AT1G08150	0	0	0
AT1G08160	0	0	-1
AT1G08165	0	1	0
AT1G08170	0	1	1
AT1G08180	0	-1	1
AT1G08190	0	-1	1
AT1G08200	0	0	-1
AT1G08210	0	0	1
AT1G08220	0	-1	0
AT1G08230	0	0	1
AT1G08250	0	1	-1
AT1G08260	0	0	-1
AT1G08270	0	0	1
AT1G08280	0	-1	-1
AT1G08290	0	0	0
AT1G08300	0	-1	1
AT1G08310	0	1	-1
AT1G08315	0	0	1
AT1G08320	0	-1	1
AT1G08340	0	-1	0
AT1G08350	0	0	-1
AT1G08360	0	-1	-1
AT1G08370	0	0	1
AT1G08380	0	0	-1
AT1G08390	0	1	0
AT1G08400	0	-1	1
AT1G08410	0	-1	1
AT1G08420	0	0	1
AT1G08430	0	0	-1
AT1G08440	0	0	0
AT1G08450	0	-1	-1
AT1G08460	0	1	1
AT1G08465	0	0	0
AT1G08470	0	-1	-1
AT1G08480	0	-1	-1
AT1G08490	0	0	1
AT1G08500	0	0	-1
AT1G08510	0	-1	0
AT1G08520	0	0	-1
AT1G08530	0	-1	0
AT1G08540	0	0	-1
AT1G08550	0	1	0
AT1G08560	0	0	-1
AT1G08570	0	1	1
AT1G08580	0	-1	0
AT1G08590	0	0	-1
AT1G08600	0	0	1
AT1G08610	0	-1	1
AT1G08620	0	-1	1
AT1G08630	0	0	1
AT1G08640	0	-1	-1
AT1G08650	0	1	1
AT1G08660	0	-1	-1
AT1G08670	0	0	-1
AT1G08680	0	-1	1
AT1G08695	0	0	0
AT1G08700	0	-1	0
AT1G08710	0	0	1
AT1G08720	0	-1	1
AT1G08730	0	1	0
AT1G08750	0	-1	0
AT1G08760	0	-1	1
AT1G08770	0	0	0
AT1G08780	0	-1	0
AT1G08790	0	0	1
AT1G08800	0	0	-1
AT1G08810	0	0	-1
AT1G08820	0	0	0
AT1G08830	0	-1	-1
AT1G08840	0	0	1
AT1G08845	0	-1	1
AT1G08860	0	1	1
AT1G08880	0	-1	0
AT1G08890	0	0	-1
AT1G08900	0	0	-1
AT1G08910	0	0	1
AT1G08920	0	0	-1
AT1G08930	0	-1	-1
AT1G08940	0	0	-1
AT1G08960	0	-1	-1
AT1G08970	0	-1	1
AT1G08980	0	0	-1
AT1G08985	0	0	0
AT1G08990	0	0	-1
AT1G09000	0	0	0
AT1G09010	0	0	0
AT1G09020	0	-1	-1
AT1G09026	0	0	-1
AT1G09030	0	0	0
AT1G09040	0	1	-1
AT1G09050	0	0	-1
AT1G09060	0	0	1
AT1G09070	0	-1	1
AT1G09080	0	0	1
AT1G09090	0	1	0
AT1G09100	0	-1	1
AT1G09130	0	0	-1
AT1G09140	0	0	1
AT1G09150	0	-1	0
AT1G09155	0	0	0
AT1G09157	0	0	-1
AT1G09160	0	-1	-1
AT1G09170	0	0	-1
AT1G09176	0	1	1
AT1G09180	0	-1	0
AT1G09190	0	-1	1
AT1G09195	0	0	0
AT1G09200	0	0	-1
AT1G09210	0	0	-1
AT1G09220	0	-1	0
AT1G09230	0	-1	1
AT1G09240	0	1	-1
AT1G09245	0	1	1
AT1G09250	0	1	-1
AT1G09260	0	0	0
AT1G09270	0	-1	0
AT1G09280	0	0	1
AT1G09290	0	-1	1
AT1G09300	0	-1	1
AT1G09310	0	0	-1
AT1G09320	0	0	1
AT1G09330	0	-1	-1
AT1G09340	0	-1	-1
AT1G09350	0	1	0
AT1G09360	0	0	0
AT1G09370	0	0	0
AT1G09380	0	0	-1
AT1G09390	0	0	-1
AT1G09400	0	0	0
AT1G09410	0	0	0
AT1G09415	0	0	0
AT1G09420	0	0	0
AT1G09421	0	0	1
AT1G09430	0	1	0
AT1G09440	0	0	-1
AT1G09450	0	0	-1
AT1G09460	0	0	-1
AT1G09470	0	0	-1
AT1G09480	0	0	0
AT1G09483	0	1	1
AT1G09490	0	-1	-1
AT1G09500	0	1	1
AT1G09510	0	1	0
AT1G09520	0	0	1
AT1G09530	0	0	-1
AT1G09540	0	1	-1
AT1G09550	0	0	0
AT1G09560	0	0	-1
AT1G09570	0	-1	1
AT1G09575	0	0	-1
AT1G09580	0	-1	-1
AT1G09590	0	-1	-1
AT1G09600	0	0	-1
AT1G09610	0	0	-1
AT1G09620	0	-1	0
AT1G09625	0	0	0
AT1G09630	0	-1	-1
AT1G09640	0	-1	0
AT1G09645	0	-1	1
AT1G09650	0	0	-1
AT1G09660	0	-1	-1
AT1G09665	0	0	0
AT1G09680	0	-1	1
AT1G09690	0	-1	-1
AT1G09700	0	-1	1
AT1G09710	0	0	1
AT1G09720	0	0	0
AT1G09730	0	0	1
AT1G09740	0	1	0
AT1G09750	0	0	-1
AT1G09760	0	-1	0
AT1G09770	0	0	1
AT1G09780	0	0	-1
AT1G09790	0	0	-1
AT1G09794	0	-1	1
AT1G09795	0	-1	1
AT1G09800	0	-1	-1
AT1G09810	0	-1	1
AT1G09812	0	1	-1
AT1G09815	0	-1	1
AT1G09820	0	0	0
AT1G09830	0	-1	-1
AT1G09840	0	-1	0
AT1G09850	0	0	-1
AT1G09860	0	0	0
AT1G09870	0	-1	1
AT1G09880	0	1	0
AT1G09890	0	0	0
AT1G09900	0	-1	0
AT1G09910	0	1	1
AT1G09920	0	1	0
AT1G09930	0	0	0
AT1G09932	0	0	0
AT1G09935	0	0	1
AT1G09940	0	0	0
AT1G09950	0	-1	1
AT1G09960	0	-1	1
AT1G09970	0	0	1
AT1G09980	0	-1	0
AT1G10000	0	1	0
AT1G10010	0	0	0
AT1G10020	0	-1	1
AT1G10030	0	0	-1
AT1G10040	0	-1	1
AT1G10050	0	-1	1
AT1G10060	0	1	0
AT1G10070	0	1	1
AT1G10090	0	1	-1
AT1G10095	0	0	0
AT1G10100	0	0	-1
AT1G10110	0	-1	1
AT1G10120	0	0	-1
AT1G10130	0	-1	-1
AT1G10140	0	0	1
AT1G10150	0	0	-1
AT1G10155	0	0	0
AT1G10160	0	1	-1
AT1G10170	0	1	1
AT1G10180	0	-1	-1
AT1G10190	0	0	0
AT1G10200	0	-1	-1
AT1G10210	0	1	1
AT1G10220	0	1	0
AT1G10230	0	-1	0
AT1G10240	0	-1	1
AT1G10250	0	0	0
AT1G10270	0	-1	1
AT1G10280	0	-1	0
AT1G10290	0	-1	-1
AT1G10300	0	0	-1
AT1G10310	0	0	1
AT1G10320	0	0	1
AT1G10330	0	-1	0
AT1G10340	0	0	0
AT1G10350	0	0	-1
AT1G10360	0	-1	0
AT1G10370	0	-1	-1
AT1G10380	0	0	-1
AT1G10385	0	0	-1
AT1G10390	0	-1	1
AT1G10400	0	0	-1
AT1G10410	0	1	0
AT1G10417	0	0	0
AT1G10430	0	-1	0
AT1G10450	0	-1	1
AT1G10455	0	0	-1
AT1G10460	0	0	-1
AT1G10470	0	-1	-1
AT1G10480	0	0	0
AT1G10490	0	-1	1
AT1G10500	0	1	1
AT1G10510	0	-1	-1
AT1G10520	0	-1	1
AT1G10522	0	-1	-1
AT1G10530	0	0	0
AT1G10540	0	0	-1
AT1G10550	0	0	-1
AT1G10560	0	0	-1
AT1G10570	0	0	0
AT1G10580	0	-1	1
AT1G10585	0	0	0
AT1G10586	0	0	0
AT1G10588	0	1	0
AT1G10590	0	0	0
AT1G10600	0	1	1
AT1G10610	0	1	0
AT1G10620	0	0	-1
AT1G10630	0	-1	-1
AT1G10640	0	0	0
AT1G10650	0	0	-1
AT1G10652	0	0	0
AT1G10657	0	0	-1
AT1G10660	0	1	0
AT1G10670	0	0	-1
AT1G10680	0	1	0
AT1G10682	0	0	-1
AT1G10690	0	1	-1
AT1G10700	0	1	-1
AT1G10710	0	0	0
AT1G10717	0	0	-1
AT1G10720	0	-1	-1
AT1G10730	0	-1	1
AT1G10740	0	-1	-1
AT1G10745	0	0	-1
AT1G10747	0	0	-1
AT1G10750	0	-1	0
AT1G10760	0	0	-1
AT1G10770	1	1	1
AT1G10780	0	0	-1
AT1G10790	0	-1	-1
AT1G10800	0	0	-1
AT1G10810	0	0	-1
AT1G10820	0	-1	-1
AT1G10830	0	-1	0
AT1G10840	0	-1	1
AT1G10850	0	1	-1
AT1G10865	0	0	1
AT1G10870	0	0	0
AT1G10880	0	1	1
AT1G10890	0	0	1
AT1G10900	0	-1	1
AT1G10910	0	0	-1
AT1G10920	0	0	0
AT1G10930	0	-1	-1
AT1G10940	0	-1	1
AT1G10950	0	-1	-1
AT1G10960	0	-1	-1
AT1G10970	0	-1	0
AT1G10980	0	1	1
AT1G10990	0	0	-1
AT1G11000	0	0	-1
AT1G11020	0	0	1
AT1G11040	0	0	0
AT1G11050	0	1	1
AT1G11060	0	0	1
AT1G11070	0	1	0
AT1G11080	0	0	0
AT1G11090	0	-1	0
AT1G11100	0	1	1
AT1G11110	0	0	0
AT1G11112	0	0	-1
AT1G11120	0	-1	-1
AT1G11125	0	-1	-1
AT1G11130	0	0	-1
AT1G11145	0	0	-1
AT1G11150	0	0	0
AT1G11160	0	0	-1
AT1G11170	0	0	1
AT1G11175	0	1	1
AT1G11180	0	1	1
AT1G11185	0	0	-1
AT1G11190	0	1	-1
AT1G11200	0	-1	0
AT1G11210	0	0	0
AT1G11220	0	0	-1
AT1G11230	0	0	-1
AT1G11240	0	-1	1
AT1G11250	0	0	0
AT1G11260	0	-1	1
AT1G11270	0	0	0
AT1G11280	0	-1	0
AT1G11290	0	-1	-1
AT1G11300	0	0	1
AT1G11310	0	-1	-1
AT1G11320	0	-1	1
AT1G11330	0	0	-1
AT1G11340	0	1	-1
AT1G11350	0	1	-1
AT1G11360	0	1	0
AT1G11362	0	0	0
AT1G11370	0	0	1
AT1G11380	0	0	0
AT1G11390	0	-1	-1
AT1G11400	0	-1	1
AT1G11410	0	1	1
AT1G11420	0	0	0
AT1G11430	0	-1	-1
AT1G11440	0	1	-1
AT1G11450	0	0	-1
AT1G11460	0	1	0
AT1G11470	0	1	0
AT1G11475	0	-1	1
AT1G11480	0	1	1
AT1G11490	0	0	-1
AT1G11500	0	0	0
AT1G11510	0	0	0
AT1G11520	0	0	0
AT1G11530	0	1	1
AT1G11540	0	1	-1
AT1G11545	0	0	-1
AT1G11560	0	0	0
AT1G11570	0	0	-1
AT1G11572	0	0	0
AT1G11580	0	0	-1
AT1G11590	0	0	0
AT1G11592	0	0	1
AT1G11593	0	0	0
AT1G11600	0	0	-1
AT1G11608	0	1	0
AT1G11610	0	0	-1
AT1G11620	0	0	0
AT1G11630	0	-1	0
AT1G11650	0	-1	1
AT1G11655	0	0	-1
AT1G11660	0	-1	-1
AT1G11670	0	0	-1
AT1G11680	0	-1	-1
AT1G11684	0	1	0
AT1G11690	0	0	1
AT1G11700	0	1	-1
AT1G11710	0	0	1
AT1G11720	0	1	0
AT1G11730	0	0	-1
AT1G11735	0	0	-1
AT1G11740	0	0	-1
AT1G11750	0	0	-1
AT1G11755	0	-1	0
AT1G11760	0	1	1
AT1G11765	0	1	0
AT1G11770	0	1	0
AT1G11780	0	-1	0
AT1G11785	0	0	0
AT1G11790	0	0	-1
AT1G11800	0	-1	1
AT1G11810	0	0	0
AT1G11820	0	-1	1
AT1G11840	0	1	1
AT1G11850	0	0	-1
AT1G11860	0	1	-1
AT1G11870	0	-1	-1
AT1G11880	0	-1	0
AT1G11890	0	-1	-1
AT1G11900	0	-1	0
AT1G11905	0	-1	-1
AT1G11910	0	-1	1
AT1G11915	0	0	1
AT1G11920	0	1	0
AT1G11925	0	0	0
AT1G11930	0	1	0
AT1G11940	0	-1	0
AT1G11950	0	1	1
AT1G11960	0	-1	1
AT1G11970	0	0	0
AT1G11980	0	0	0
AT1G11990	0	0	0
AT1G12000	0	-1	-1
AT1G12010	0	0	0
AT1G12013	0	-1	1
AT1G12020	0	-1	1
AT1G12030	0	0	0
AT1G12040	0	-1	-1
AT1G12050	0	0	-1
AT1G12060	0	1	1
AT1G12064	0	-1	1
AT1G12070	0	0	-1
AT1G12080	0	0	-1
AT1G12090	0	0	-1
AT1G12100	0	0	-1
AT1G12110	0	-1	-1
AT1G12120	0	-1	0
AT1G12130	0	1	1
AT1G12140	0	-1	1
AT1G12150	0	0	-1
AT1G12160	0	1	-1
AT1G12170	0	0	0
AT1G12180	0	0	-1
AT1G12190	0	0	0
AT1G12200	0	-1	-1
AT1G12210	0	0	1
AT1G12220	0	0	0
AT1G12230	0	0	-1
AT1G12240	0	0	-1
AT1G12244	0	0	-1
AT1G12250	0	1	-1
AT1G12260	0	0	-1
AT1G12270	0	-1	-1
AT1G12280	0	1	1
AT1G12290	0	-1	1
AT1G12300	0	0	0
AT1G12310	0	0	-1
AT1G12320	0	-1	1
AT1G12330	0	1	1
AT1G12350	0	0	0
AT1G12360	0	1	-1
AT1G12370	0	0	0
AT1G12380	0	0	-1
AT1G12390	0	0	-1
AT1G12400	0	-1	0
AT1G12410	0	0	-1
AT1G12411	0	0	0
AT1G12420	0	1	-1
AT1G12423	0	0	0
AT1G12430	0	0	0
AT1G12440	0	-1	1
AT1G12450	0	1	-1
AT1G12451	0	0	0
AT1G12460	0	0	-1
AT1G12470	0	0	1
AT1G12480	0	1	-1
AT1G12490	0	0	0
AT1G12500	0	0	-1
AT1G12520	0	-1	1
AT1G12530	0	-1	-1
AT1G12540	0	0	0
AT1G12550	0	0	1
AT1G12560	0	0	-1
AT1G12570	0	1	0
AT1G12580	0	0	0
AT1G12600	0	0	1
AT1G12610	0	0	-1
AT1G12620	0	0	0
AT1G12630	0	0	0
AT1G12640	0	1	0
AT1G12650	0	-1	1
AT1G12660	0	0	0
AT1G12663	0	0	0
AT1G12665	0	0	0
AT1G12672	0	1	1
AT1G12680	0	1	1
AT1G12700	0	0	0
AT1G12710	0	1	1
AT1G12720	0	0	0
AT1G12725	0	0	1
AT1G12730	0	0	0
AT1G12740	0	0	-1
AT1G12750	0	1	0
AT1G12760	0	0	1
AT1G12770	0	0	-1
AT1G12775	0	0	0
AT1G12780	0	-1	1
AT1G12790	0	0	-1
AT1G12800	0	-1	-1
AT1G12805	0	-1	1
AT1G12810	0	-1	1
AT1G12820	0	-1	-1
AT1G12830	0	-1	1
AT1G12840	0	-1	-1
AT1G12845	0	0	-1
AT1G12850	0	-1	-1
AT1G12855	0	1	1
AT1G12860	0	-1	-1
AT1G12870	0	0	1
AT1G12880	0	0	-1
AT1G12890	0	0	0
AT1G12900	0	1	-1
AT1G12910	0	-1	1
AT1G12920	0	-1	1
AT1G12930	0	0	0
AT1G12938	0	0	0
AT1G12940	0	1	1
AT1G12950	0	0	-1
AT1G12960	0	-1	0
AT1G12970	0	1	1
AT1G12980	0	1	1
AT1G12990	0	-1	-1
AT1G13000	0	-1	-1
AT1G13010	0	0	0
AT1G13020	0	0	-1
AT1G13030	0	-1	1
AT1G13040	0	0	0
AT1G13050	0	0	1
AT1G13060	0	-1	1
AT1G13080	0	0	-1
AT1G13090	0	1	1
AT1G13100	0	-1	-1
AT1G13110	0	0	-1
AT1G13120	0	-1	1
AT1G13130	0	1	-1
AT1G13140	0	0	-1
AT1G13150	0	0	-1
AT1G13160	0	-1	1
AT1G13170	0	0	-1
AT1G13180	0	-1	0
AT1G13190	0	1	1
AT1G13195	0	1	1
AT1G13200	0	0	-1
AT1G13210	0	-1	-1
AT1G13220	0	-1	1
AT1G13230	0	0	-1
AT1G13245	0	0	1
AT1G13250	0	0	-1
AT1G13260	0	0	-1
AT1G13270	0	-1	-1
AT1G13280	0	0	-1
AT1G13290	0	0	1
AT1G13300	0	0	0
AT1G13310	0	0	0
AT1G13320	0	-1	-1
AT1G13330	0	-1	1
AT1G13340	0	-1	1
AT1G13350	0	0	1
AT1G13360	0	1	1
AT1G13370	0	0	0
AT1G13380	0	-1	-1
AT1G13390	0	1	1
AT1G13400	0	0	-1
AT1G13410	0	0	1
AT1G13420	0	0	-1
AT1G13430	0	0	-1
AT1G13440	0	-1	-1
AT1G13448	0	0	-1
AT1G13450	0	1	1
AT1G13460	0	0	0
AT1G13470	0	0	0
AT1G13480	0	0	-1
AT1G13485	0	0	0
AT1G13490	0	0	-1
AT1G13500	0	-1	0
AT1G13510	0	0	0
AT1G13520	0	1	-1
AT1G13530	0	0	-1
AT1G13540	0	0	-1
AT1G13550	0	0	-1
AT1G13560	0	-1	0
AT1G13570	0	0	1
AT1G13580	0	-1	-1
AT1G13590	0	-1	0
AT1G13600	0	0	0
AT1G13605	0	0	0
AT1G13607	0	0	0
AT1G13608	0	0	0
AT1G13609	0	0	-1
AT1G13610	0	1	-1
AT1G13620	0	0	-1
AT1G13630	0	-1	1
AT1G13635	0	0	-1
AT1G13640	0	1	1
AT1G13650	0	0	0
AT1G13660	0	0	0
AT1G13670	0	1	-1
AT1G13680	0	0	0
AT1G13690	0	-1	1
AT1G13700	0	0	0
AT1G13710	0	0	-1
AT1G13730	0	-1	0
AT1G13740	0	1	1
AT1G13750	0	1	-1
AT1G13755	0	0	0
AT1G13760	0	0	-1
AT1G13770	0	-1	0
AT1G13780	0	1	1
AT1G13790	0	0	1
AT1G13800	0	-1	0
AT1G13810	0	-1	1
AT1G13820	0	1	0
AT1G13830	0	0	-1
AT1G13860	0	1	-1
AT1G13870	0	0	1
AT1G13880	0	0	1
AT1G13890	0	1	0
AT1G13900	0	0	-1
AT1G13910	0	-1	1
AT1G13920	0	1	-1
AT1G13930	0	0	-1
AT1G13940	0	-1	0
AT1G13950	0	0	-1
AT1G13960	0	1	1
AT1G13970	0	0	-1
AT1G13980	0	-1	-1
AT1G13990	0	1	1
AT1G14000	0	-1	1
AT1G14010	0	0	-1
AT1G14020	0	0	-1
AT1G14030	0	0	-1
AT1G14040	0	-1	0
AT1G14048	0	1	1
AT1G14060	0	-1	1
AT1G14070	0	0	-1
AT1G14071	0	0	0
AT1G14080	0	0	-1
AT1G14100	0	0	-1
AT1G14110	0	0	0
AT1G14120	0	0	-1
AT1G14130	0	1	0
AT1G14140	0	0	-1
AT1G14150	0	0	-1
AT1G14160	0	0	0
AT1G14170	0	1	-1
AT1G14180	0	1	-1
AT1G14185	0	1	-1
AT1G14190	0	0	-1
AT1G14200	0	1	1
AT1G14205	0	0	-1
AT1G14210	0	-1	-1
AT1G14220	0	0	-1
AT1G14230	0	-1	1
AT1G14240	0	0	-1
AT1G14250	0	0	0
AT1G14260	0	0	-1
AT1G14270	0	0	-1
AT1G14280	0	0	-1
AT1G14290	0	0	-1
AT1G14300	0	-1	1
AT1G14310	0	-1	-1
AT1G14315	0	0	0
AT1G14320	0	-1	-1
AT1G14330	0	0	-1
AT1G14340	0	-1	1
AT1G14345	0	0	-1
AT1G14350	0	0	-1
AT1G14360	0	-1	-1
AT1G14370	0	0	-1
AT1G14380	0	1	-1
AT1G14390	0	0	-1
AT1G14400	0	1	-1
AT1G14410	0	-1	-1
AT1G14420	0	1	1
AT1G14430	0	1	-1
AT1G14440	0	-1	-1
AT1G14450	0	-1	-1
AT1G14455	0	0	1
AT1G14460	0	0	-1
AT1G14470	0	0	0
AT1G14480	0	0	0
AT1G14490	0	0	1
AT1G14500	0	0	0
AT1G14510	0	-1	1
AT1G14518	0	0	1
AT1G14520	0	1	1
AT1G14530	0	1	1
AT1G14540	0	0	-1
AT1G14549	0	0	0
AT1G14550	0	-1	0
AT1G14560	0	-1	1
AT1G14570	0	0	1
AT1G14580	0	-1	1
AT1G14590	0	0	0
AT1G14600	0	-1	-1
AT1G14610	0	-1	0
AT1G14620	0	-1	-1
AT1G14630	0	0	0
AT1G14640	0	-1	1
AT1G14642	0	0	1
AT1G14650	0	-1	1
AT1G14660	0	0	1
AT1G14670	0	-1	-1
AT1G14680	0	0	0
AT1G14685	0	-1	0
AT1G14686	0	0	0
AT1G14687	0	0	-1
AT1G14688	0	0	-1
AT1G14690	0	-1	-1
AT1G14700	0	0	-1
AT1G14710	0	-1	-1
AT1G14720	0	1	-1
AT1G14730	0	0	-1
AT1G14740	0	1	1
AT1G14750	0	0	-1
AT1G14755	0	0	1
AT1G14760	0	-1	1
AT1G14770	0	-1	1
AT1G14780	0	0	-1
AT1G14790	0	0	-1
AT1G14800	0	0	0
AT1G14810	0	-1	-1
AT1G14820	0	0	-1
AT1G14830	0	-1	-1
AT1G14840	0	0	-1
AT1G14850	0	-1	1
AT1G14860	0	-1	0
AT1G14870	0	0	-1
AT1G14880	0	1	0
AT1G14890	0	0	-1
AT1G14900	0	-1	-1
AT1G14910	0	-1	1
AT1G14920	0	-1	1
AT1G14930	0	1	1
AT1G14940	0	1	1
AT1G14950	0	1	1
AT1G14960	0	1	1
AT1G14970	0	1	1
AT1G14980	0	-1	0
AT1G14990	0	-1	0
AT1G15000	0	-1	-1
AT1G15002	0	0	1
AT1G15010	0	0	-1
AT1G15015	0	0	0
AT1G15020	0	1	0
AT1G15030	0	1	-1
AT1G15040	0	0	-1
AT1G15045	0	0	0
AT1G15050	0	1	-1
AT1G15060	0	1	1
AT1G15080	0	0	-1
AT1G15100	0	1	1
AT1G15110	0	1	0
AT1G15120	0	-1	-1
AT1G15125	0	0	0
AT1G15130	0	-1	1
AT1G15140	0	0	-1
AT1G15150	0	0	0
AT1G15160	0	1	1
AT1G15165	0	1	0
AT1G15170	0	0	1
AT1G15175	0	1	1
AT1G15180	0	1	1
AT1G15190	0	0	-1
AT1G15200	0	-1	1
AT1G15210	0	0	-1
AT1G15215	0	-1	0
AT1G15220	0	0	1
AT1G15230	0	1	1
AT1G15240	0	1	1
AT1G15250	0	-1	1
AT1G15260	0	-1	-1
AT1G15270	0	-1	0
AT1G15280	0	-1	1
AT1G15290	0	-1	-1
AT1G15300	0	-1	1
AT1G15310	0	-1	1
AT1G15320	0	1	1
AT1G15330	0	1	1
AT1G15340	0	1	1
AT1G15350	0	0	-1
AT1G15360	0	0	0
AT1G15370	0	-1	0
AT1G15380	0	-1	1
AT1G15385	0	0	-1
AT1G15390	0	-1	-1
AT1G15400	0	1	0
AT1G15410	0	0	-1
AT1G15415	0	0	0
AT1G15420	0	-1	1
AT1G15430	0	1	1
AT1G15440	0	-1	1
AT1G15460	0	0	0
AT1G15470	0	-1	-1
AT1G15480	0	-1	1
AT1G15490	0	0	-1
AT1G15500	0	-1	-1
AT1G15510	0	-1	1
AT1G15520	0	0	0
AT1G15530	0	1	0
AT1G15540	0	0	-1
AT1G15550	0	-1	-1
AT1G15560	0	0	0
AT1G15570	0	0	-1
AT1G15580	0	0	-1
AT1G15590	0	1	0
AT1G15600	0	0	0
AT1G15610	0	1	1
AT1G15620	0	0	0
AT1G15630	0	0	-1
AT1G15640	0	0	-1
AT1G15660	0	0	-1
AT1G15670	0	-1	-1
AT1G15680	0	0	0
AT1G15690	0	-1	-1
AT1G15700	0	-1	0
AT1G15710	0	-1	-1
AT1G15720	0	1	1
AT1G15730	0	0	-1
AT1G15740	0	1	1
AT1G15750	0	-1	1
AT1G15757	0	-1	-1
AT1G15760	0	0	0
AT1G15770	0	0	0
AT1G15772	0	0	0
AT1G15780	0	-1	1
AT1G15790	0	-1	1
AT1G15800	0	1	0
AT1G15810	0	-1	-1
AT1G15820	0	0	-1
AT1G15825	0	-1	-1
AT1G15830	0	1	1
AT1G15840	0	1	0
AT1G15850	0	0	0
AT1G15860	0	-1	0
AT1G15870	0	-1	1
AT1G15880	0	0	1
AT1G15885	0	0	0
AT1G15890	0	0	0
AT1G15900	0	0	-1
AT1G15910	0	0	-1
AT1G15920	0	-1	1
AT1G15930	0	-1	-1
AT1G15940	0	-1	1
AT1G15950	0	0	0
AT1G15960	0	1	0
AT1G15970	0	0	-1
AT1G15980	0	0	-1
AT1G15990	0	1	0
AT1G16000	0	-1	-1
AT1G16010	0	-1	1
AT1G16020	0	0	-1
AT1G16022	0	0	-1
AT1G16030	0	-1	1
AT1G16040	0	-1	1
AT1G16060	0	0	-1
AT1G16070	0	1	-1
AT1G16080	0	0	-1
AT1G16090	0	1	1
AT1G16110	0	0	0
AT1G16120	0	0	-1
AT1G16130	0	1	-1
AT1G16150	0	0	0
AT1G16160	0	0	0
AT1G16170	0	-1	-1
AT1G16180	0	-1	1
AT1G16190	0	-1	-1
AT1G16210	0	0	1
AT1G16220	0	-1	1
AT1G16225	0	0	0
AT1G16230	0	0	-1
AT1G16240	0	1	1
AT1G16250	0	0	0
AT1G16260	0	0	-1
AT1G16270	0	0	1
AT1G16280	0	-1	1
AT1G16290	0	0	0
AT1G16300	0	-1	1
AT1G16310	0	0	-1
AT1G16320	0	1	1
AT1G16330	0	1	-1
AT1G16340	0	0	-1
AT1G16350	0	-1	-1
AT1G16360	0	0	-1
AT1G16370	0	0	-1
AT1G16380	0	1	0
AT1G16390	0	0	-1
AT1G16400	0	0	0
AT1G16410	0	0	0
AT1G16420	0	0	0
AT1G16430	0	-1	0
AT1G16440	0	1	-1
AT1G16445	0	-1	-1
AT1G16460	0	0	0
AT1G16470	0	-1	1
AT1G16480	0	0	0
AT1G16489	0	0	-1
AT1G16490	0	1	-1
AT1G16500	0	-1	-1
AT1G16510	0	1	1
AT1G16515	0	-1	1
AT1G16520	0	-1	-1
AT1G16530	0	0	0
AT1G16540	0	0	1
AT1G16560	0	-1	-1
AT1G16570	0	0	-1
AT1G16590	0	0	0
AT1G16610	0	-1	1
AT1G16630	0	0	-1
AT1G16635	0	-1	1
AT1G16640	0	0	-1
AT1G16650	0	0	1
AT1G16660	0	0	0
AT1G16670	0	0	0
AT1G16680	0	0	1
AT1G16690	0	0	0
AT1G16700	0	-1	-1
AT1G16705	0	1	0
AT1G16710	0	0	1
AT1G16720	0	0	0
AT1G16730	0	1	1
AT1G16740	0	-1	1
AT1G16750	0	1	-1
AT1G16760	0	0	0
AT1G16770	0	1	1
AT1G16780	0	-1	-1
AT1G16790	0	-1	0
AT1G16800	0	0	1
AT1G16810	0	0	1
AT1G16820	0	0	0
AT1G16825	0	0	-1
AT1G16830	0	-1	1
AT1G16840	0	1	1
AT1G16850	0	1	1
AT1G16858	0	1	-1
AT1G16870	0	-1	-1
AT1G16880	0	0	-1
AT1G16890	0	-1	0
AT1G16900	0	-1	1
AT1G16905	0	0	-1
AT1G16910	0	0	0
AT1G16916	0	0	-1
AT1G16920	0	0	-1
AT1G16930	0	1	0
AT1G16940	0	0	0
AT1G16950	0	0	0
AT1G16960	0	0	-1
AT1G16970	0	-1	1
AT1G16980	0	0	0
AT1G17000	0	1	1
AT1G17010	0	1	1
AT1G17020	0	-1	0
AT1G17030	0	0	-1
AT1G17040	0	1	1
AT1G17050	0	1	-1
AT1G17060	0	0	0
AT1G17070	0	-1	1
AT1G17080	0	1	1
AT1G17090	0	1	1
AT1G17100	0	1	1
AT1G17110	0	1	-1
AT1G17120	0	0	-1
AT1G17130	0	0	1
AT1G17140	0	0	0
AT1G17145	0	1	1
AT1G17147	0	1	1
AT1G17150	0	0	-1
AT1G17160	0	0	-1
AT1G17170	0	-1	-1
AT1G17180	0	0	-1
AT1G17190	0	0	-1
AT1G17200	0	0	-1
AT1G17210	0	0	1
AT1G17220	0	0	-1
AT1G17230	0	0	-1
AT1G17235	0	0	-1
AT1G17240	0	1	0
AT1G17250	0	0	0
AT1G17255	0	0	0
AT1G17260	0	0	0
AT1G17270	0	-1	0
AT1G17275	0	-1	0
AT1G17277	0	0	0
AT1G17280	0	0	1
AT1G17285	0	-1	-1
AT1G17290	0	-1	1
AT1G17300	0	0	-1
AT1G17310	0	0	-1
AT1G17330	0	-1	1
AT1G17340	0	0	-1
AT1G17345	0	-1	0
AT1G17350	0	0	-1
AT1G17360	0	-1	-1
AT1G17370	0	-1	1
AT1G17380	0	0	0
AT1G17390	0	0	0
AT1G17400	0	0	-1
AT1G17410	0	1	0
AT1G17420	0	0	-1
AT1G17430	0	1	0
AT1G17440	0	-1	1
AT1G17450	0	0	1
AT1G17455	0	0	-1
AT1G17460	0	-1	1
AT1G17470	0	-1	0
AT1G17480	0	0	0
AT1G17490	0	0	1
AT1G17495	0	0	0
AT1G17500	0	0	-1
AT1G17510	0	0	1
AT1G17520	0	1	1
AT1G17530	0	0	1
AT1G17540	0	1	-1
AT1G17545	0	0	0
AT1G17550	0	1	1
AT1G17560	0	0	-1
AT1G17570	0	0	0
AT1G17580	0	1	1
AT1G17590	0	0	1
AT1G17600	0	1	0
AT1G17610	0	0	0
AT1G17615	0	0	0
AT1G17620	0	0	0
AT1G17630	0	0	0
AT1G17640	0	1	1
AT1G17650	0	-1	-1
AT1G17665	0	-1	1
AT1G17680	0	0	1
AT1G17690	0	-1	1
AT1G17700	0	0	-1
AT1G17710	0	0	-1
AT1G17720	0	-1	-1
AT1G17730	0	-1	-1
AT1G17744	0	0	-1
AT1G17745	0	0	-1
AT1G17750	0	0	-1
AT1G17760	0	1	1
AT1G17770	0	0	0
AT1G17780	0	-1	1
AT1G17790	0	1	1
AT1G17800	0	0	0
AT1G17810	0	1	1
AT1G17820	0	-1	1
AT1G17830	0	-1	1
AT1G17840	0	-1	-1
AT1G17850	0	-1	-1
AT1G17860	0	-1	-1
AT1G17870	0	1	1
AT1G17880	0	-1	-1
AT1G17890	0	0	-1
AT1G17900	0	0	0
AT1G17910	0	0	1
AT1G17920	0	-1	-1
AT1G17930	0	1	1
AT1G17940	0	0	-1
AT1G17950	0	0	0
AT1G17960	0	0	-1
AT1G17970	0	0	-1
AT1G17980	0	-1	1
AT1G18030	0	0	0
AT1G18040	0	-1	-1
AT1G18050	0	0	0
AT1G18060	0	0	-1
AT1G18070	0	-1	1
AT1G18075	0	0	-1
AT1G18080	0	-1	-1
AT1G18090	0	-1	-1
AT1G18100	0	1	1
AT1G18130	0	0	0
AT1G18140	0	0	0
AT1G18150	0	-1	-1
AT1G18160	0	0	1
AT1G18170	0	0	-1
AT1G18180	0	0	-1
AT1G18190	0	0	0
AT1G18200	0	1	-1
AT1G18210	0	1	-1
AT1G18220	0	0	0
AT1G18250	0	0	-1
AT1G18260	0	1	1
AT1G18265	0	0	-1
AT1G18270	0	1	-1
AT1G18280	0	-1	-1
AT1G18290	0	0	-1
AT1G18300	0	0	1
AT1G18310	0	0	-1
AT1G18330	0	1	0
AT1G18335	0	1	1
AT1G18340	0	-1	-1
AT1G18350	0	0	0
AT1G18360	0	0	1
AT1G18370	0	1	-1
AT1G18382	0	0	-1
AT1G18390	0	-1	-1
AT1G18400	0	0	0
AT1G18410	0	0	-1
AT1G18415	0	0	-1
AT1G18420	0	0	-1
AT1G18440	0	0	-1
AT1G18450	0	0	0
AT1G18460	0	-1	1
AT1G18470	0	0	1
AT1G18480	0	-1	0
AT1G18485	0	0	-1
AT1G18486	0	0	0
AT1G18490	0	0	0
AT1G18500	0	1	1
AT1G18510	0	1	0
AT1G18520	0	1	1
AT1G18530	0	0	0
AT1G18540	0	-1	-1
AT1G18550	0	0	-1
AT1G18560	0	-1	1
AT1G18570	0	-1	-1
AT1G18580	0	-1	-1
AT1G18590	0	0	-1
AT1G18600	0	-1	-1
AT1G18610	0	0	1
AT1G18620	0	1	-1
AT1G18630	0	-1	-1
AT1G18640	0	-1	-1
AT1G18650	0	0	-1
AT1G18660	0	-1	-1
AT1G18670	0	0	-1
AT1G18680	0	-1	-1
AT1G18690	0	0	-1
AT1G18700	0	0	0
AT1G18710	0	0	0
AT1G18720	0	0	1
AT1G18730	0	0	-1
AT1G18735	0	0	0
AT1G18740	0	-1	1
AT1G18745	0	-1	1
AT1G18750	0	0	1
AT1G18760	0	0	1
AT1G18770	0	0	0
AT1G18773	0	0	0
AT1G18780	0	0	0
AT1G18790	0	0	0
AT1G18800	0	-1	1
AT1G18810	0	0	-1
AT1G18830	0	1	0
AT1G18835	0	0	-1
AT1G18840	0	0	-1
AT1G18850	0	-1	1
AT1G18860	0	0	0
AT1G18870	0	1	-1
AT1G18871	0	0	0
AT1G18880	0	0	-1
AT1G18890	0	-1	0
AT1G18900	0	-1	1
AT1G18910	0	0	-1
AT1G18940	0	1	1
AT1G18950	0	-1	1
AT1G18960	0	-1	1
AT1G18970	0	0	0
AT1G18980	0	0	-1
AT1G18990	0	1	0
AT1G19000	0	1	1
AT1G19010	0	0	1
AT1G19020	0	-1	-1
AT1G19025	0	-1	0
AT1G19030	0	0	0
AT1G19040	0	0	-1
AT1G19050	0	0	-1
AT1G19060	0	0	0
AT1G19070	0	0	0
AT1G19080	0	0	0
AT1G19086	0	0	0
AT1G19090	0	0	1
AT1G19100	0	-1	1
AT1G19110	0	1	0
AT1G19115	0	0	0
AT1G19120	0	-1	0
AT1G19130	0	0	-1
AT1G19140	0	0	1
AT1G19150	0	0	-1
AT1G19160	0	1	0
AT1G19170	0	0	-1
AT1G19180	0	-1	-1
AT1G19190	0	0	-1
AT1G19200	0	0	-1
AT1G19210	0	0	-1
AT1G19220	0	1	-1
AT1G19230	0	1	0
AT1G19240	0	-1	1
AT1G19250	0	0	0
AT1G19270	0	-1	-1
AT1G19290	0	-1	1
AT1G19300	0	0	-1
AT1G19310	0	0	1
AT1G19320	0	0	-1
AT1G19330	0	0	-1
AT1G19340	0	-1	0
AT1G19350	0	0	-1
AT1G19360	0	-1	-1
AT1G19370	0	-1	-1
AT1G19371	0	0	1
AT1G19380	0	1	-1
AT1G19390	0	0	0
AT1G19392	0	0	0
AT1G19394	0	1	0
AT1G19396	0	1	1
AT1G19397	0	1	1
AT1G19400	0	0	1
AT1G19410	0	0	0
AT1G19415	0	0	0
AT1G19430	0	0	0
AT1G19440	0	0	0
AT1G19450	0	0	-1
AT1G19460	0	1	0
AT1G19464	0	0	0
AT1G19470	0	0	0
AT1G19480	0	0	1
AT1G19485	0	0	1
AT1G19490	0	0	1
AT1G19500	0	1	0
AT1G19510	0	0	-1
AT1G19520	0	-1	-1
[truncated: 27,915 more rows]
